# Supplementary material
Source: PubMed Central journal article supplement (PMC5074557)
Supplement: NIHMS526941-supplement-supplement_1.pdf [file NIHMS526941-supplement-supplement_1.pdf]

# Suppl. Fig. 1

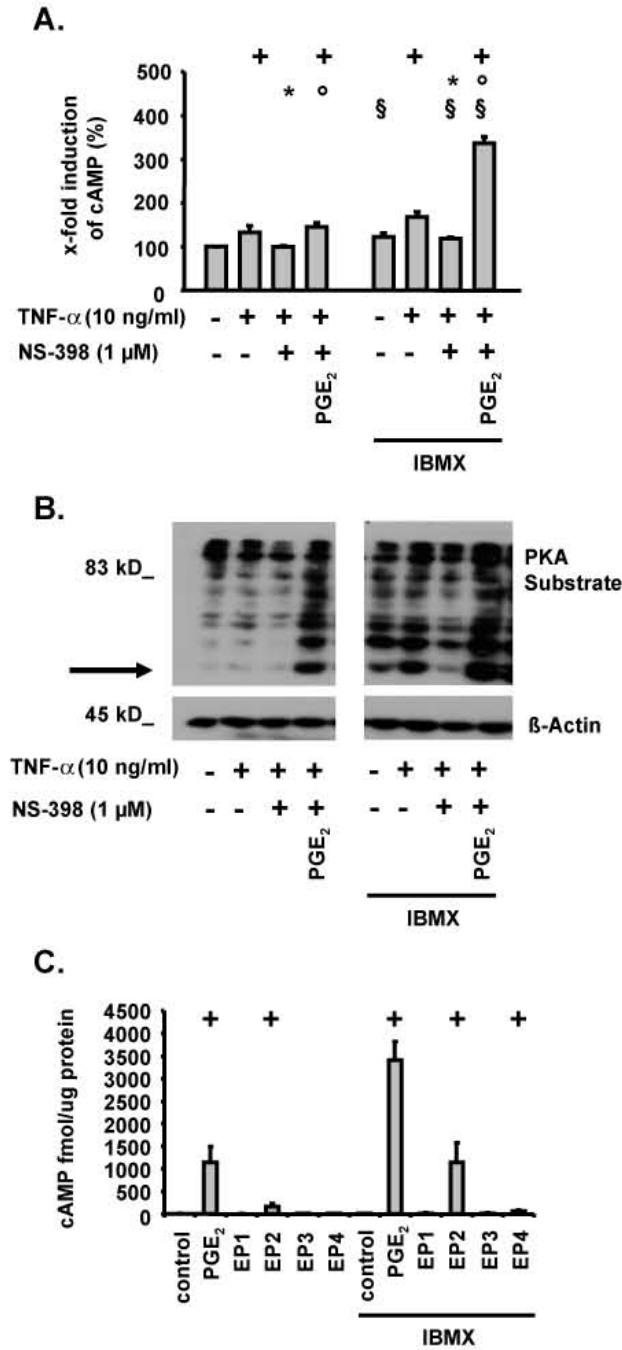

**Suppl. Fig. 1: Influence of PGE<sub>2</sub> on the TNF- $\alpha$ -induced increase of cAMP levels and PKA substrate phosphorylation; effects of specific agonists of the EP receptors 1-4 on cAMP levels in RASFs (in both cases without/with IBMX).** Cells were stimulated with TNF- $\alpha$  (10 ng/ml) in the absence or presence of NS-398 or PGE<sub>2</sub> for 10 h (A and B; 1  $\mu$ M each; in both cases without/with IBMX); alternatively, cells were stimulated with PGE<sub>2</sub> or specific EP receptor agonists for 30 min (C). Intracellular cAMP was determined by RIA (A) or ELISA (C) and PKA substrate phosphorylation by western blot (B). Results are expressed as means  $\pm$  SEM for 3 patients with RA. + =  $p \sim 0.05$  Mann-Whitney U-Test versus the respective control; \* =  $p \sim 0.05$  Mann-Whitney U-Test versus TNF- $\alpha$ ; ° =  $p \sim 0.05$  Mann-Whitney U-Test versus TNF- $\alpha$ /NS-398; § =  $p \sim 0.05$  Mann-Whitney U-Test versus stimulation without IBMX.

# Suppl. Fig. 2

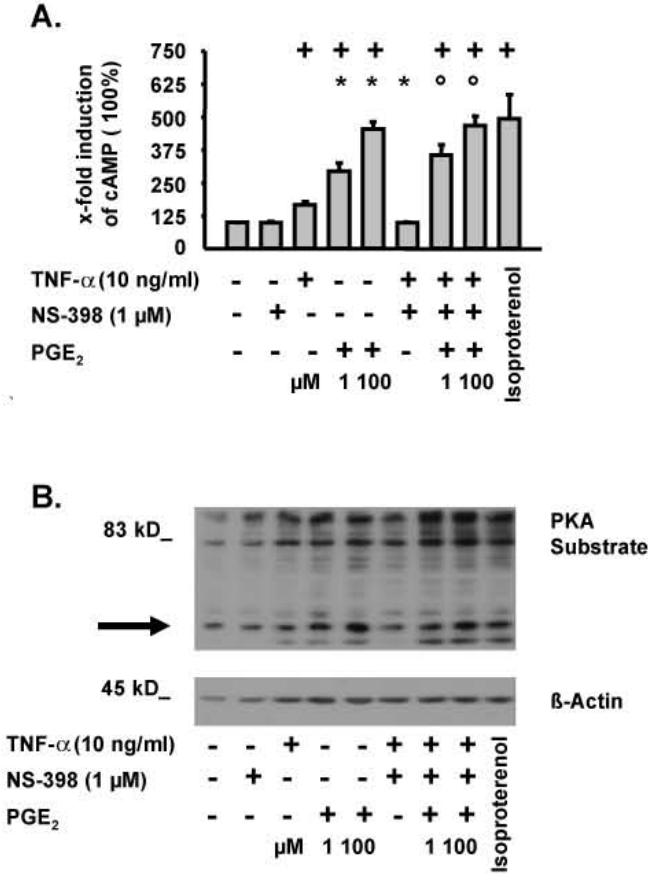

**Suppl. Fig. 2: Influence of different doses of PGE<sub>2</sub> on the TNF- $\alpha$ -induced increase of cAMP levels and PKA substrate phosphorylation in RASFs.** Cells were stimulated for 10 h with TNF- $\alpha$  (10 ng/ml) in the absence or presence of NS-398 or different doses of PGE<sub>2</sub> (1 or 100  $\mu$ M with IBMX). Intracellular cAMP was determined by RIA (A) and PKA substrate phosphorylation by western blot analysis (B). Results are expressed as means  $\pm$  SEM for 3 patients with RA. + = p  $\sim$  0.05 Mann-Whitney U-Test versus the respective control; \* = p  $\sim$  0.05 Mann-Whitney U-Test versus TNF- $\alpha$ ; ° = p  $\sim$  0.05 Mann-Whitney U-Test versus TNF- $\alpha$ /NS-398.

### Suppl. Fig. 3

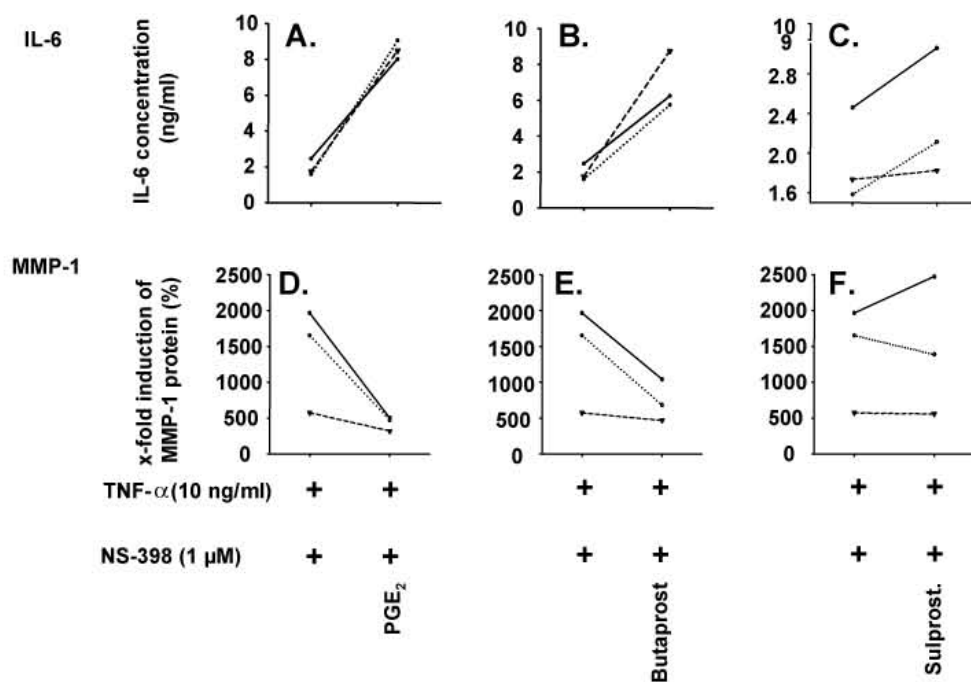

**Suppl. Fig. 3: Effect of PGE<sub>2</sub> or selective EP2/EP3 receptor agonists on MMP-1 and IL-6 protein secretion in individual patients.** RASFs were harvested at 24 h post TNF- $\alpha$  (10 ng/ml) stimulation with NS-398 (1  $\mu$ M) and PGE<sub>2</sub> (1  $\mu$ M) or selective EP2 (butaprost) or EP3 (sulprostone) receptor agonists (1  $\mu$ M each). IL-6 secretion was analyzed by ELISA (A, B, C) and MMP-1 secretion by western blot (D, E, F). Individual results with/without stimulation with PGE<sub>2</sub>, butaprost or sulprostone are shown for 3 patients with RA.

Suppl. Fig. 4

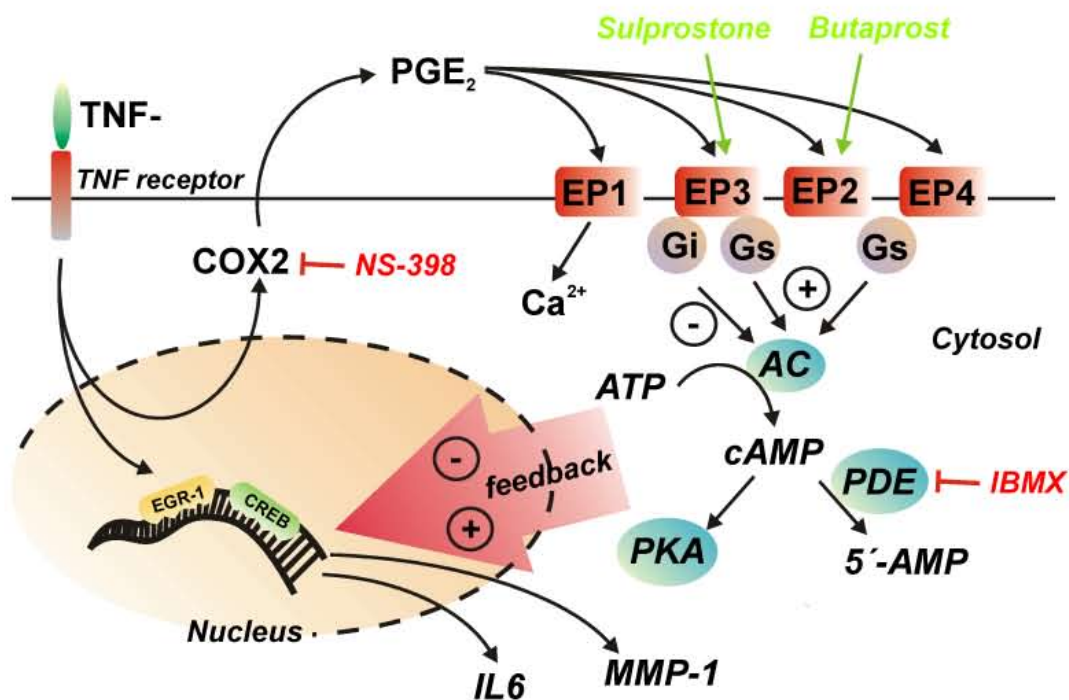

**Fig. 4: Scheme of the signal transduction and effector functions in RASFs following stimulation with TNF- $\alpha$  and/or PGE<sub>2</sub>.** NS-398: specific inhibitor of COX-2; EP1 – EP4: PGE<sub>2</sub> receptors of the EP1 – EP4 type; Gi: Inhibiting G protein; Gs: stimulating G protein; AC: adenylate cyclase; PDE: phosphodiesterase; PKA: Protein kinase A; EGR-1: Early growth response-1; CREB: cAMP response element-binding protein.
